# Supplementary material for: The Global Burden of Meningitis in Children: Challenges with Interpreting Global Health Estimates
Source: PubMed Central journal article supplement (PMC7917636; doi:10.3390/microorganisms9020377), 2021-02-13
Supplement: microorganisms-09-00377-s001.pdf [file microorganisms-09-00377-s001.pdf]

## Contents

|                                                                            |   |
|----------------------------------------------------------------------------|---|
| Mortality modelling methods – Meningitis, encephalitis and neonatal sepsis | 1 |
| GBD 2017                                                                   | 1 |
| WHO-MCEE 2000-2017                                                         | 3 |
| Pathogen specific meningitis mortality and incidence modelling methods     | 4 |
| GBD 2017                                                                   | 4 |
| MCEE/JHSPH5                                                                |   |

## Tables and Figures

|                                                                                                                                 |    |
|---------------------------------------------------------------------------------------------------------------------------------|----|
| Table S1: ICD10 codes mapped to meningitis, encephalitis and neonatal sepsis according to model                                 | 7  |
| Table S2: Definitions of IHME's GBD 2017 data quality star rating                                                               | 12 |
| Table S3: Location level covariates according to model                                                                          | 13 |
| Table S4: Covariates used in WHO-MCEE's multinomial logistic regression by age group, model and cause                           | 14 |
| Table S5: MCEE Final cause of death list                                                                                        | 15 |
| Table S6: MCEE modelled cause of death categories according to age                                                              | 16 |
| Figure S1: Quality of underlying cause of death data and modelling methods used to generate death estimates according to model. | 17 |

## Mortality modelling methods – Meningitis, encephalitis and neonatal sepsis

This section provides a brief overview on how the different models derive meningitis, encephalitis and neonatal sepsis mortality estimates. However, full methodology is provided by the modellers elsewhere.

Both GBD 2017 and MCEE 2000-2017 models used cause of death data from vital registration (VR) systems, sample registration systems (SR) and verbal autopsy (VA) studies to assign causes of death ensuring that the total number of deaths matches other estimates for the age-specific all-cause mortality. This involves the generation of data where data are

incomplete or completely missing. The models also try to correct for poor quality cause of death data.

A description of each model is outlined below.

#### GBD 2017

A core step in the GBD 2017 estimation process was the creation of a cause of death (CoD) database where cause of death data obtained from individual countries is mapped to the GBD cause list of 282 diseases and split into age and sex categories [3].

The International Classification of Diseases ICD10 codes used to map to the GBD cause categories “meningitis”, “encephalitis” and “neonatal sepsis and other neonatal infections” are outlined in Table S1.

Some causes of death were not considered specific enough to be mapped to a particular GBD cause of death category, could not be the underlying cause of death (e.g. senility) or had been assigned to the immediate or intermediate cause of death rather than the underlying cause (e.g. heart failure) and were therefore considered to be garbage codes. A statistical process was used to redistribute garbage codes to other causes of death and smooth out unrealistic data points.

For GBD 2017 meningitis death estimates, a total of 19,331 vital registration (VR) data points, 1,470 verbal autopsy (VA) data points, 793 sample registration (SR) data points and 546 surveillance data points were used [3]. A data point represents cause of death data in an individual location for a specific year. For example, VR data from a specific location for the years 1990-2017 inclusive would equate to 28 data points.

VR country-years with data less than 50% complete were dropped and country data with completeness between 50 – 69% were flagged as non-representative in the CoD database. Raw data points from VR and SR were adjusted using death distribution methods that assess the completeness of death recording relative to census recording. Raw age specific mortality was then divided by estimated completeness to account for under ascertainment in VR and SR data.

To address cause of death data that is incomplete or not available for many locations IHME used Cause of Death Ensemble Models (CODEm) to fill in the gaps in the data by drawing on data from countries with more complete data, similar characteristics and geography. Different CODEm were used to estimate meningitis deaths according to sex and in the 0 days to 4 years age group compared to 5 years and older. Additionally different CODEm models were used to estimate meningitis deaths from data rich locations (in countries with 4-star or greater rated VR systems) compared to the global model which includes all countries and data and includes those countries and territories where data was less reliable or where there was no data at all [2]. Definitions of the IHME data quality star rating is outlined in Table S2. In locations with data, the in-country data is heavily weighted, and data from the region and super region has a minor influence. In locations without data, estimates are informed by covariates and by data from the region and super region.

Location-level covariates used in CODEm models are outlined in Table S3.

Estimates generated from the CODEm models were then combined with other cause of death estimates ensuring that the sum matched the total all-cause mortality envelope for

each age group, sex, location and year. The all-cause mortality envelope is generated using a combination of surveys, censuses and vital registration data.

#### GBD 2017 encephalitis death estimates

Deaths from encephalitis were modelled using CODEm. The covariates used are outlined in Table S3. A total of 19,028 vital registration (VR) data points, 395 verbal autopsy (VA) data points and 793 sample registration (SR) data points were used [3].

#### GBD 2017 neonatal sepsis death estimates

Deaths from neonatal sepsis were modelled in children under 5 years using CODEm in four separate age groups: Early neonatal period, late neonatal period, post neonatal period and 1-4 years. The covariates used are outlined in Table S3. A total of 18,175 vital registration (VR) data points, 165 verbal autopsy (VA) data points and 791 sample registration (SR) data points were used [3]. Modellers excluded the majority of verbal autopsy data (apart from in India) in the estimation of neonatal sepsis deaths because validation studies indicate that verbal autopsy methods are less accurate or defining cause of death in this age group.

#### WHO-MCEE 2000-2017

WHO-MCEE calculated cause of death fractions according to a predefined cause list (Table S5). These cause of death fractions were then applied to neonatal and 1-59 month all-cause estimates produced by UN-IGME. The underlying data used by UN-IGME for calculating mortality rate and deaths comes from surveys, censuses and vital registration data.

Three methods were used to calculate cause of death fractions for a country depending on the quality of the cause of death data available for that country and its mortality setting.

VR data - For countries with high quality data covering >80% of the population VR data was used directly to estimate cause of death fractions attributed to the cause categories described in Table S5. Data was defined as high quality if countries had reported at least five years of data to WHO with an average usability over this period of equal to or over 80%. Usability is calculated as completeness of data multiplied by the proportion of registered deaths that are assigned a meaningful cause [27, 49]. The ICD10 codes used to map to meningitis, encephalitis and neonatal sepsis are provided in Table S1.

VRMCM – In low mortality countries (<35 deaths/1000 live births 2000-2010) data from the countries with high quality VR were used to fit a multinomial logistic regression model, called the vital registration multi-cause model (VRMCM), using the covariates outlined in Tables 3 and 4. Cause of death fractions were attributed to the cause categories described in Table S6.

VAMCM - In high mortality countries (>35 deaths/1000 live births 2000-2010) the cause distribution was estimated using a multinomial model applied to verbal autopsy data. The verbal autopsy multi-cause model (VAMCM) was a multinomial logistic regression model fitted using VA data from 119 studies in 39 countries using the covariates outlined in Tables 3 and 4. Cause of death fractions were attributed to the cause categories described in Table S6.

Causes of death within the early neonatal (0-6 days), late neonatal (7-28 days) and post neonatal period (0-11 months) were modelled separately from each other because the cause of death distributions can differ significantly within these age groups. Different country specific covariates were used to derive the predictions based on age, model type and cause

(Table S4). Despite the early and late neonatal period being modelled separately, only neonatal and post neonatal cause of death estimates are published. Post-hoc adjustment covariates were also used to account for meningitis deaths averted by PCV and Hib vaccines. The adjustments take into account serotype coverage of the vaccine in the case of PCV, vaccine coverage and vaccine effectiveness.

In the MCEE 2000-2017 estimation round neonatal meningitis was estimated separately from neonatal sepsis for the first time. These causes were estimated separately for the first time in their latest modelling round by using the ratio of neonatal meningitis and neonatal sepsis deaths derived from IHME estimates. The six recognised direct causes of neonatal deaths identifiable by verbal autopsy are: (1) serious infection (including sepsis, pneumonia and meningitis), (2) birth asphyxia, (3) prematurity, (4) tetanus, (5) congenital malformation and (6) diarrhoea [50].

### Pathogen specific meningitis mortality and incidence modelling methods

#### GBD 2017

#### Pathogen specific mortality estimates

GBD 2017 assigned overall deaths from meningitis as predicted using CODEm into pathogenic causes using a set of proportional models in DisMod-MR 2.1. Proportions were informed using vital registration death data coded down to cause-level. The meningococcal meningitis proportion model used two country level covariates (the proportion of the population living in the meningitis belt and the proportion of the population covered by the MenAfriVac vaccine). The pneumococcal meningitis proportion model used PCV3 vaccine coverage as a covariate and the Hib model used Hib3 vaccine coverage as a covariate. The other meningitis proportion model included Hib3 vaccine coverage, pneumococcal vaccine coverage, and the proportion of people living in the meningitis belt. The four proportion models were scaled to sum to 100% for each location, age-group, sex, and year combination to convert meningitis deaths into meningitis deaths by aetiology [3].

CODEm smooths VR or VA data over time which can result in spikes caused by outbreaks not being represented in the data. For this reason meningococcal meningitis outbreaks were estimated as a fatal discontinuity which means they were added to overall meningitis deaths after they were corrected to fit within remainder of all-cause mortality envelope (CODCorrect). The Global Infectious Disease and Epidemiology Network (GIDEON) and WHO death reports were used as the data sources for epidemic meningococcal meningitis deaths.

#### Pathogen specific incidence estimates

Overall incidence of acute bacterial meningitis was modelled using DisMod- MR 2.1 informed by incidence data gathered from hospital records, claims data and a systematic review of the literature capturing incidence studies. In total 5,535 site-years of incidence data fed into the model [51]. DisMod- MR 2.1 pools all the available incidence data adjusting for systematic bias associated with the source of the data and its variance from a reference data source which in this case was ICD coded hospital data. Three country level covariates (proportion of the population living in the meningitis belt, coverage of Hib3 vaccine and coverage of MenAfriVac vaccine) were also applied in locations where data was lacking.

Meningitis incidence was then assigned by aetiology using a second set of DisMod- MR 2.1 proportion models. Proportions by aetiology were informed by surveillance data and

literature that reports cause fractions. A Hib vaccine coverage covariate was applied to the Hib proportion model, the proportion of the population living in the meningitis belt and coverage of MenAfriVac vaccine was applied to the meningococcal meningitis proportion model and PCV3 coverage covariate applied to the pneumococcal meningitis model. Data sources encompassed both epidemic and non-epidemic years, but cases arising as a result of meningococcal meningitis outbreaks were not added to incidence estimates separately.

#### MCEE/JHSPH

##### Pathogen specific mortality estimates

The MCEE/JHSPH pathogenic model assigned pathogenic causes to estimated deaths from meningitis/encephalitis from the WHO/MCEE 2000-2015 syndromic model, adjusted to represent no vaccine use. For the purposes of the model the entire meningitis/encephalitis envelope was assumed to be meningitis.

Proportions of deaths due to each pathogen were informed by a meta-analysis of meningitis case aetiology distribution pre-vaccine era (stratified by region). It was assumed that 88% of meningitis in the pre-vaccine era was caused by pneumococcal, Hib and meningococcal bacteria combined. As the literature on case aetiology distribution was relatively rich and aetiology of mortality distribution relatively poor, poor case aetiology distribution was converted into proportions of deaths using relative pathogen specific case fatality rates (stratified by child mortality setting). Once country and pathogen- specific meningitis deaths prior to vaccine use had been calculated, adjustments were made to account for country specific Hib and pneumococcal vaccine coverage [14].

WHO/MCEE account for children infected with human immunodeficiency virus (HIV) who die from meningitis in HIV/AIDS death estimates [52]. MCEE/JHSPH include deaths from meningitis which occurred in HIV-positive children by applying relative risks for invasive pneumococcal and Hib disease to annual estimates of HIV prevalence [14].

##### Pathogen specific incidence estimates

To calculate meningitis incidence according to pathogen, pathogen-specific deaths according to country were divided by country and pathogen specific meningitis case fatality ratio estimates. In areas with low health seeking behaviour for pneumonia symptoms, as derived from Demographic and Health Surveys and UNICEF's Multiple Indicator Cluster Surveys, a case fatality rate of 90% was assumed.

Table S1: ICD10 codes mapped to meningitis, encephalitis and neonatal sepsis according to model

| IHME                                                                                                              | MCEE       |
|-------------------------------------------------------------------------------------------------------------------|------------|
| Meningitis/                                                                                                       |            |
| Encephalitis                                                                                                      | Meningitis |
| A39.0 Meningococcal meningitis                                                                                    |            |
| A39.1 - Waterhouse-Friderichsen syndrome (Meningococcal haemorrhagic adrenalitis, Meningococcal adrenal syndrome) |            |

A39.2 - Acute meningococcaemia  
A39.3 - Chronic meningococcaemia  
A39.4 - Meningococcaemia  
A39.8 - Other meningococcal infections  
A39.9 - Meningococcal infection, unspecified  
A87.0 - Enteroviral meningitis (G02.0\*)  
A87.1 - Adenoviral meningitis (G02.0\*)  
A87.2 - Lymphocytic choriomeningitis  
A87.8 - Other viral meningitis  
A87.9 - Viral meningitis, unspecified  
D86.81 - [D86.8] Sarcoidosis of other and combined site  
G00.0 - Haemophilus meningitis  
G00.1 - Pneumococcal meningitis  
G00.9 - Bacterial meningitis unspecified  
G01 - Meningitis in bacterial diseases classified elsewhere  
G02 - Meningitis in other infectious and parasitic diseases classified elsewhere  
G02.0 - Meningitis in viral diseases classified elsewhere  
G02.1 - Meningitis in mycoses  
G02.8 - Meningitis in other specified infectious and parasitic diseases classified elsewhere  
G03.9 - Meningitis unspecified  
G03.1 - Chronic meningitis  
G03.2 - Benign recurrent meningitis (Mollaret)  
G03.8 - Meningitis due to other specified causes  
Encephalitis  
A83.0 - Japanese encephalitis  
A83.1 - Western equine encephalitis  
A83.2 - Eastern equine encephalitis  
A83.3 - St Louis encephalitis  
A83.4 - Australian encephalitis  
A83.5 - California encephalitis  
A83.6 - Rocio virus disease

A83.8 - Other mosquito-borne viral encephalitis  
A83.9 - Mosquito-borne viral encephalitis, unspecified  
A84.0 Far Eastern tick-borne encephalitis [Russian spring-summer encephalitis]  
A84.1 central European Tick-borne encephalitis  
A84.8 Other tick-borne viral encephalitis  
A84.9 Tick-borne viral encephalitis, unspecified  
A85.0 Enteroviral encephalitis (G05.1\*)  
Enteroviral encephalomyelitis  
A85.1 Adenoviral encephalitis (G05.1\*)  
Adenoviral meningoencephalitis  
A85.2 Arthropod-borne viral encephalitis, unspecified  
A85.8 Other specified viral encephalitis  
A86 Unspecified viral encephalitis  
B94.1 Sequelae of viral encephalitis  
F07.1 Post encephalitic syndrome  
G04.0 - Acute disseminated encephalitis  
G04.1 - Tropical spastic paraplegia  
G04.2 - Bacterial meningoencephalitis and meningomyelitis, not elsewhere classified  
G04.8 - Other encephalitis, myelitis and encephalomyelitis  
G04.9 - Encephalitis, myelitis and encephalomyelitis, unspecified  
G05.0\* - Encephalitis, myelitis and encephalomyelitis in bacterial diseases classified elsewhere  
G05.1\* - Encephalitis, myelitis and encephalomyelitis in viral diseases classified elsewhere  
G05.2\* - Encephalitis, myelitis and encephalomyelitis in other infectious and parasitic diseases classified elsewhere  
G05.8\* - Encephalitis, myelitis and encephalomyelitis in other diseases classified elsewhere  
G21.3 Postencephalitic parkinsonism      A20.3 - Plague meningitis  
A32.1 - Listerial meningitis and meningoencephalitis  
A39.0 - Meningococcal meningitis (G01\*)  
A39.1 - Waterhouse-Friderichsen syndrome (Meningococcal haemorrhagic adrenalitis, Meningococcal adrenal syndrome)  
A39.2 - Acute meningococcaemia

A39.3 - Chronic meningococcaemia  
A39.4 - Meningococcaemia  
A39.5 - Meningococcal heart disease  
A39.8 - Other meningococcal infections  
A39.9 - Meningococcal infection, unspecified  
A83.0 - Japanese encephalitis  
A83.1 - Western equine encephalitis  
A83.2 - Eastern equine encephalitis  
A83.3 - St Louis encephalitis  
A83.4 - Australian encephalitis  
A83.5 - California encephalitis  
A83.6 - Rocio virus disease  
A83.8 - Other mosquito-borne viral encephalitis  
A83.9 - Mosquito-borne viral encephalitis, unspecified  
A87.0 - Enteroviral meningitis (G02.0\*)  
A87.1 - Adenoviral meningitis (G02.0\*)  
A87.2 - Lymphocytic choriomeningitis  
A87.8 - Other viral meningitis  
A87.9 - Viral meningitis, unspecified  
G00.0 - Haemophilus meningitis  
G00.1 - Pneumococcal meningitis  
G00.2 - Streptococcal meningitis  
G00.3 - Staphylococcal meningitis  
G00.8 - Other bacterial meningitis (E.coli, Friedlander bacillus, Klebsiella)  
G00.9 - Bacterial meningitis, unspecified (purulent NOS, pyogenic NOS, suppurative NOS)  
G03.0 - Nonpyogenic meningitis  
G03.1 - Chronic meningitis  
G03.2 - Benign recurrent meningitis (Mollaret)  
G03.8 - Meningitis due to other specified causes  
G03.9 - Meningitis, unspecified  
G04.0 - Acute disseminated encephalitis



G04.1 - Tropical spastic paraplegia

G04.2 - Bacterial meningoenzephalitis and meningomyelitis, not elsewhere classified

G04.8 - Other enzephalitis, myelitis and enzephalomyelitis

G04.9 - Enzephalitis, myelitis and enzephalomyelitis, unspecified

Neonatal Sepsis      P36.0 - Sepsis of newborn due to streptococcus, group B

P36.1 - Sepsis of newborn due to other and unspecified streptococci

P36.2 - Sepsis of newborn due to staphylococcus aureus

P36.3 - Sepsis of newborn due to other and unspecified staphylococci

P36.4 - Sepsis of newborn due to Escherichia coli

P36.5 - Sepsis of newborn due to anaerobes

P36.8 - Other bacterial sepsis of newborn

P36.9 - Bacterial sepsis of newborn, unspecified

P38 - Omphalitis of newborn with or without mild haemorrhage

P39.9 - Infection specific to the perinatal period, unspecified      A15 - Respiratory  
tuberculosis, bacteriologically and histologically confirmed

A20.2 Pneumonic plague

A20.7 - Septicaemic plague

A20.8 - Other forms of plague

A20.9 - Plague, unspecified

A21 - Tularaemia

A22 - Anthrax

A23 - Brucellosis

A24 - Glanders and melioidosis

A25 - Rat-bite fevers

A26 - Erysipeloid

A27 - Leptospirosis

A28 - Other zoonotic bacterial diseases, not elsewhere classified

A30 - Leprosy

A31 - Infection due to other mycobacteria

A32.0 - Cutaneous listeriosis

A32.7 - Listerial sepsis

A32.9 - Listeriosis, unspecified  
A38 – Scarlet fever  
A40 - Streptococcal sepsis  
A41 - Other sepsis  
A42 - Actinomycosis  
A43 - Nocardiosis  
A44 - Bartonellosis  
A46 - Erysipelas  
A48 - Other bacterial diseases, not elsewhere classified  
A49 - Bacterial infection of unspecified site  
A50 - Congenital syphilis  
A51 - Early syphilis  
A52 - Late syphilis  
A53 - Other and unspecified syphilis  
A54 - Gonococcal infection  
A55 - Chlamydial lymphogranuloma (venereum)  
A56 - Other sexually transmitted chlamydial diseases  
A57 - Chancroid  
A58 - Granuloma inguinale  
A59 - Trichomoniasis  
A60 - Anogenital herpesviral [herpes simplex] infection  
A63 - Other predominantly sexually transmitted diseases, not elsewhere classified  
A64 - Unspecified sexually transmitted disease  
A65 - Nonvenereal syphilis  
A66 - Yaws  
A67 - Pinta [carate]  
A68 - Relapsing fevers  
A69 - Other spirochaetal infections  
A70 - Chlamydia psittaci infection  
A71 - Trachoma  
A74 - Other diseases caused by chlamydiae

- A75 - Typhus fever
- A77 - Spotted fever [tick-borne rickettsioses]
- A78 - Q fever
- A79 - Other rickettsioses
- A80 - Acute poliomyelitis
- A81 - Atypical virus infections of central nervous system
- A82 - Rabies
- A88 - Other viral infections of central nervous system, not elsewhere classified
- A89 - Unspecified viral infection of central nervous system
- A90 - Dengue fever [classical dengue]
- A91 - Dengue haemorrhagic fever
- A92 - Other mosquito-borne viral fevers
- A93 - Other arthropod-borne viral fevers, not elsewhere classified
- A94 - Unspecified arthropod-borne viral fever
- A95 - Yellow fever
- A96 - Arenaviral haemorrhagic fever
- A98 - Other viral haemorrhagic fevers, not elsewhere classified
- A99 - Unspecified viral haemorrhagic fever
- B00 - Herpesviral [herpes simplex] infections
- B01 - Varicella [chickenpox]
- B02 - Zoster [herpes zoster]
- B03 – Smallpox
- B04 – Monkeypox
- B05 – Measles
- B06 - Rubella [German measles]
- B07 - Viral warts
- B08 - Other viral infections characterized by skin and mucous membrane lesions, not elsewhere classified
- B09 - Unspecified viral infection characterized by skin and mucous membrane lesions
- B15 - Acute hepatitis A
- B16 - Acute hepatitis B
- B17 - Other acute viral hepatitis

- B18 - Chronic viral hepatitis
- B19 - Unspecified viral hepatitis
- B25 - Cytomegaloviral disease
- B26 – Mumps
- B27 - Infectious mononucleosis
- B30 - Viral conjunctivitis
- B33 - Other viral diseases, not elsewhere classified
- B34 - Viral infection of unspecified site
- B35 – Dermatophytosis
- B36 - Other superficial mycoses
- B37 – Candidiasis
- B38 – Coccidioidomycosis
- B39 – Histoplasmosis
- B40 – Blastomycosis
- B41 – Paracoccidioidomycosis
- B42 – Sporotrichosis
- B43 - Chromomycosis and phaeomycotic abscess
- B44 – Aspergillosis
- B45 – Cryptococcosis
- B46 – Zygomycosis
- B47 – Mycetoma
- B48 - Other mycoses, not elsewhere classified
- B49 - Unspecified mycosis
- B55 – Leishmaniasis
- B56 - African trypanosomiasis
- B57 - Chagas disease
- B58 – Toxoplasmosis
- B59 – Pneumocystosis
- B60 - Other protozoal diseases, not elsewhere classified
- B64 - Unspecified protozoal disease
- B65 – B83 Helminthiasis

- B85 – B89 - Pediculosis, acariasis and other infestations
- B90 – B94 - Sequelae of infectious and parasitic diseases
- B95 - Streptococcus and staphylococcus as the cause of diseases classified to other chapters
- B96 - Other specified bacterial agents as the cause of diseases classified to other chapters
- B97 - Viral agents as the cause of diseases classified to other chapters
- B98 - Other specified infectious agents as the cause of diseases classified to other chapters
- B99 - Other and unspecified infectious diseases
- G01 - Meningitis in bacterial diseases classified elsewhere
- G02 - Meningitis in other infectious and parasitic diseases classified elsewhere
- G05.0 - Encephalitis, myelitis and encephalomyelitis in bacterial diseases classified elsewhere
- G05.1 - Encephalitis, myelitis and encephalomyelitis in viral diseases classified elsewhere
- G05.2 - Encephalitis, myelitis and encephalomyelitis in other infectious and parasitic disease classified elsewhere
- G05.8 - Encephalitis, myelitis and encephalomyelitis in other diseases classified elsewhere
- G06.0 - Intracranial abscess and granuloma
- G06.1 - Intrapinal abscess and granuloma
- G06.2 - Extradural and subdural abscess, unspecified
- G07 - Intracranial and intraspinal abscess and granuloma in disease classified elsewhere
- G08 - Intracranial and intraspinal phlebitis and thrombophlebitis
- G09 - Sequelae of inflammatory diseases of central nervous system
- P35.0 - Congenital rubella syndrome
- P35.1 - Congenital cytomegalovirus infection
- P35.2 - Congenital herpesviral [herpes simplex] infection
- P35.3 - Congenital viral hepatitis
- P35.8 - Other congenital viral diseases
- P35.9 - Congenital viral disease, unspecified
- P36.0 - Sepsis of newborn due to streptococcus, group B
- P36.1 - Sepsis of newborn due to other and unspecified streptococci
- P36.2 - Sepsis of newborn due to staphylococcus aureus
- P36.3 - Sepsis of newborn due to other and unspecified staphylococci

- P36.4 - Sepsis of newborn due to Escherichia coli
- P36.5 - Sepsis of newborn due to anaerobes
- P36.8 - Other bacterial sepsis of newborn
- P36.9 - Bacterial sepsis of newborn, unspecified
- P37.0 - Congenital tuberculosis
- P37.1 - Congenital toxoplasmosis
- P37.2 - Neonatal (disseminated) listeriosis
- P37.5 - Neonatal candidiasis
- P37.8 - Other specified congenital infectious and parasitic diseases
- P37.9 - Congenital infectious and parasitic disease, unspecified
- P38 - Omphalitis of newborn with or without mild haemorrhage
- P39.0 - Neonatal infective mastitis
- P39.1 - Neonatal conjunctivitis and dacryocystitis
- P39.2 - Intra-amniotic infection of fetus, not elsewhere classified
- P39.3 - Neonatal urinary tract infection
- P39.4 - Neonatal skin infection
- P39.8 - Other specified infections specific to the perinatal period
- P39.9 - Infection specific to the perinatal period, unspecified

Table S2: Definitions of IHME's GBD 2017 data quality star rating

| Data quality star rating | Definition                                                            |
|--------------------------|-----------------------------------------------------------------------|
| 5 stars                  | 85%-100% well-certified                                               |
| 4 stars                  | 65%-84% well-certified                                                |
| 3 stars                  | 35%-64% well-certified                                                |
| 2 stars                  | 10%-34% well-certified                                                |
| 1 star                   | >0%-9% well-certified                                                 |
| 0 stars                  | No vital registration or verbal autopsy data available from 1980-2017 |

% well-certified is a function of the completeness of the cause of death data multiplied by the quality of the data – e.g. the proportion of deaths registered to a well-defined cause.

Table S3: Location level covariates according to model

GBD 2017 location level covariates used in CODEm according to cause of death Full list of potential WHO-MCEE location level covariates used in VRMCM and/or VAMCM

Included in all models (meningitis/encephalitis and neonatal sepsis)      Proportion of children <5 yrs who are underweight

Healthcare access and Quality Index

Health system access (composite of vaccine coverage and pregnancy services),

Lag distributed income per capita (I\$),

Maternal education (years per capita)      Female literacy

Gini coefficient

Neonatal mortality rate

Infant mortality rate

Under 5 mortality rate

Under 5 population size

Low birth weight

GNI per capita (PPP, \$international)

Human development index

Education index

Antenatal care coverage

Percentage of births with skilled birth attendance

Percent urbanisation

Percent with access to improved drinking water

General fertility rate

Neonates protected at birth against neonatal tetanus

Percent low birth weight

Plasmodium falciparum parasite rate

Meningitis epidemic

BCG vaccine coverage

PAB vaccine coverage

DTP3 vaccine coverage

Hib3 vaccine coverage

Measles vaccine coverage

Year

WHO region

Meningitis Proportion of population living in the meningitis belt

Proportion of households with access to improved water

DTP3 vaccine coverage

Hib3 vaccine coverage

MenAfriVac vaccine coverage from 2010 to 2012

Sociodemographic index,

Sanitation (proportion with access)

Encephalitis Japanese encephalitis binary,

DTP3 coverage,

Proportion of in-facility deliveries,

Sanitation (proportion with access),

Water (proportion with access),

Socio-demographic Index

Neonatal sepsis Indoor air pollution (all cooking fuels),

Smoking prevalence (reproductive age-standardized),

Antenatal care (4 visits) coverage (proportion),

In-facility delivery (proportion),

Live births 35+ (proportion),

Skilled birth attendance (proportion),

Age-standardised underweight (weight-for-age) SEV,

Total fertility rate,

Socio-demographic Index

Table S4: Covariates used in WHO-MCEE's multinomial logistic regression by age group, model and cause

| Cause                   | Age group   | VRMCM                                 | VAMCM |
|-------------------------|-------------|---------------------------------------|-------|
| Meningitis              | 1-59 months | Region                                |       |
| Year                    |             |                                       |       |
| Human development index |             |                                       |       |
| Hib3 vaccine coverage   |             | GNI per capita (PPP, \$international) |       |



Measles vaccine coverage

Meningitis epidemic

Sepsis and other severe infections    Early neonatal Gini coefficient

Infant mortality rate

    BCG vaccine coverage

Period

Low birth weight

    Late neonatal Gini coefficient

Low birth weight

Neonatal mortality rate          Antenatal care coverage

Female literacy

Period

Neonates protected at birth against neonatal tetanus

Perinatal (inc. sepsis) 1-59 months    Region,

Hib3 vaccine coverage,DTP3 vaccine coverage

Under 5 mortality rate

Percentage of births with skilled birth attendance

Percent with access to improved drinking water    Period,

Underweight

Table S5: MCEE Final cause of death list

HIV/AIDS

Complications of preterm birth

Intrapartum-related complications

Congenital anomalies

Pneumonia

Diarrhoea

Tetanus

Meningitis/encephalitis

Sepsis and other infectious conditions of the newborn\*

Malaria\*\*

Measles\*\*

Injuries

Other communicable diseases

Other non-communicable diseases

\*Neonatal only

\*\*Postneonatal only

Table S6: MCEE modelled cause of death categories according to age

Neonatal cause of death categories    Post neonatal cause of death categories

Complications of preterm birth        Pneumonia

Intrapartum-related complications    Diarrhoea

Congenital disorders    Malaria\*

Pneumonia    Meningitis

Diarrhoea    Injuries

Neonatal tetanus\*    Congenital malformations

Sepsis and other severe infections    Perinatal

Injuries    Other non-communicable diseases\*\*

Other causes    Other causes

\*VAMCM only – not modelled in VRMCM

\*\*VRMCM only – not modelled in VAMCM

Figure S1: Quality of underlying cause of death data and modelling methods used to generate death estimates according to model.

#### References

Refer to main paper “The Global Burden of Meningitis in Children: Challenges with Interpreting Global Health Estimates”
